# Supplementary material for: A positive feedback loop linking enhanced mGluR function and basal calcium in spinocerebellar ataxia type 2
Source: eLife. 2017 May 18;6:e26377. doi: 10.7554/eLife.26377 (PMC5444899; doi:10.7554/eLife.26377)
Supplement: Supplementary file 1. — DOI: http://dx.doi.org/10.7554/eLife.26377.007 [file elife-26377-supp1.xlsx]

## Sheet: fig1
Figure1					DHPG
				8wks		12 wks			24 wks
			WT	TG
		Avg	103.727	110.261		100.796	115.158		102.418	121.791
		STD	12.1026	14.0063		14.738	16.6027		5.36371	21.8233
		SEM	1.80415	2.85902		2.73677	2.84735		1.11841	4.36466
		N	45	24		29	34		23	25
	ANOVA
					Table Analyzed	Data 1
					Two-way ANOVA	Ordinary
					Alpha	0.05
					Source of Variation	% of total variation	P value	P value summary	Significant?
					Interaction	2.467	0.0706	ns	No
					Genotype	16.19	< 0.0001	****	Yes
					Time	1.624	0.1732	ns	No
					ANOVA table	SS	DF	MS	F (DFn, DFd)	P value
					Interaction	1170	2	584.9	F (2, 174) = 2.691	P = 0.0706
					Genotype	7676	1	7676	F (1, 174) = 35.32	P < 0.0001
					Time	769.8	2	384.9	F (2, 174) = 1.771	P = 0.1732
					Residual	37816	174	217.3
					Number of missing values	90
					Sidak's multiple comparisons test	Mean Diff.	95% CI of diff.	Significant?	Summary						Sidak's multiple comparisons test	Mean Diff.	95% CI of diff.	Significant?	Summary
					WT - SCA2										WT
					8 Weeks	-6.534	-15.52 to 2.450	No	ns						8 Weeks vs. 12 Weeks	2.931	-5.533 to 11.39	No	ns
					12 Weeks	-14.36	-23.35 to -5.378	Yes	***						8 Weeks vs. 24 Weeks	1.309	-7.802 to 10.42	No	ns
					24 Weeks	-19.37	-29.64 to -9.104	Yes	****						12 Weeks vs. 24 Weeks	-1.622	-11.55 to 8.302	No	ns
															SCA2
					Test details	Mean 1	Mean 2	Mean Diff.	SE of diff.	N1	N2	t	DF		8 Weeks vs. 12 Weeks	-4.897	-14.37 to 4.578	No	ns
															8 Weeks vs. 24 Weeks	-11.53	-21.69 to -1.374	Yes	*
					WT - SCA2										12 Weeks vs. 24 Weeks	-6.633	-16.00 to 2.731	No	ns
					8 Weeks	103.7	110.3	-6.534	3.726	45	24	1.754	174
					12 Weeks	100.8	115.2	-14.36	3.726	29	34	3.854	174
					24 Weeks	102.4	121.8	-19.37	4.259	23	25	4.548	174		Test details	Mean 1	Mean 2	Mean Diff.	SE of diff.	N1	N2	t	DF
															WT
															8 Weeks vs. 12 Weeks	103.7	100.8	2.931	3.511	45	29	0.8348	174
															8 Weeks vs. 24 Weeks	103.7	102.4	1.309	3.779	45	23	0.3463	174
															12 Weeks vs. 24 Weeks	100.8	102.4	-1.622	4.116	29	23	0.394	174
															SCA2
															8 Weeks vs. 12 Weeks	110.3	115.2	-4.897	3.93	24	34	1.246	174
															8 Weeks vs. 24 Weeks	110.3	121.8	-11.53	4.213	24	25	2.737	174
															12 Weeks vs. 24 Weeks	115.2	121.8	-6.633	3.884	34	25	1.708	174
																						5P
																			graph			SCA2	WT
																			31	c2	5_10_2014	1.339	0.385
																			32	c12	5_10_2014	1.62	0.538
																			33	c25	5_10_2014	0.9728	0.838
																			37	a2	5_14_2014	0.838	0.538
																			43	b	5_17_2014	2.07	0.938
																			44	c9	4_18_2014	1.214	0.711
																			39	a24	5_14_2014	0.829	0.55
																							0.136
																						1.26897	0.57925
																						0.454574	0.19448
																						0.185579	0.0687592
																						0.00269695
Fig4			WT			SCA2			Stimulation, uAmps			SCA2
			mGluR	mGluR		mGluR	mGluR			WT		Stimulation
			5P	10P		5P	10P				cell	uAmps
			-21	-28		-38	-52		a	9	b0	8
				-6					a	9	d	4
			-4	-4		-65	-106		b	9	d1	4
			-17	-32		-70	-62		b1	9	e
			-8	-26		-50	-74		c	9		6
			-50	-77		-56	-65		d	9	f	4.4
			-37	-55					d1	9	f1	4.4
			-12	-19		-54	-107		e	9	g	2.8
			-11	-18							g1	2.8
			-35	-60		-45	-56
			-38	-67		-30	-64			9		4.55
			-29	-48		-43	-61			0		1.72295
			-20	-54						0		0.574318
			-53	-72						8		8
			-25.7692	-40.4286		-50.1111	-71.8889
			15.8911	24.472		12.7225	20.5393
			4.24706	6.54042		4.0232	6.84642
				14		9	9
		ttest	0.000770559	0.00351145
										3.87843e-06
Figure 5
														480 nM Ca2+_WT			144nM Ca2+,10 mM BAPTA
						144 nM Ca			144 nM Ca					5P	10P		WT,		SCA2
		WT	480 nM Ca			WT			SCA2					-16	-35		5P	10P	5P	10P
			5P	10P										-18	-27		mGlur	mGluR	mGlur	mGluR
		avg	-17.9167	-31.5455		-6.41739	-12.3268		-7.07692	-15.125				-11	-17		-2	-5	-4	-8
		Std	7.53728	12.9951		7.19518	11.9843		8.85403	17.8283				-16	-19		-1	-2	-3
		SEM	2.17583	3.91817		1.33611	2.82474		1.73642	4.45709				-10	-18		-5	-6	-4
		n	12	11		23	19		26	16				-25	-48				-3
														-16	-39
														-15	-23				-11	-9
														-33	-58				-15	-3
														-10	-30		-6	-7	-12	-4
														-30	-33		-3	-4	-3
														-15			-2	-2	-3
																	-1	-3
														-17.9167	-31.5455		-3		-4	-4
														7.53728	12.9951		-2		-6	-3
														2.17583	3.91817				-5	-5
														12	11				-4	-3
																	-12	-21	-4	-2
													ttest	0.000267522	0.000700688		-3	-6	-5
																	-3	-5	-2
																	-9		-2
																	-20	-37	-32	-39
																			-38	-43
																	-3	-2		-44
																	0	-6		-52
																		-3
																	-2		-5	-10
																	-1		-5	-6
																			-3	-7
																			-3
																	-3	-27
																	-17	-27.5	-1
																	-24	-34.25	-3
																	-21	-24.8	-4
																	-4.6	-11.66
																	-6.41739	-12.3268	-7.07692	-15.125
																	7.19518	11.9843	8.85403	17.8283
																	1.33611	2.82474	1.73642	4.45709
																	23	19	26	16
																ttest	0.775074	0.597747

## Sheet: fig2
Figure 2
						basal G/R
						WT	TG
					mean	1.63272	2.02936					WT					SCA2
					std	0.382449	0.568667
					sem	0.098748	0.134036		deltag/r		Freq					deltag/r		freq			ttest
					n	15	18		Avg	sem	Avg	sem	n			Avg	sem	Avg	sem	n
					ttest	0.0237828		0	0	0	0	0	15		0	0	0	0	0	18
								>0-5Hz	0.294	0.0511	3.044	0.389	10		>0-5Hz	0.337	0.101	2.358	0.101	28	0.568998
								6-10 Hz	0.5287	0.0638	8.058	0.632	8		6-10 Hz	1.011	0.32	8.028	0.32	15	0.0036
								11-20Hz	0.763	0.111	15.045	0.89	6		11-20Hz	1.369	0.154	16.11	0.6	17	0.0047
								21-30 Hz	1.456	0.11	26.25	0.635	12		21-30 Hz	2.153	0.156	24.569	0.468	29	0.00084
								31-40 Hz	2.05	0.239	33.885	1.11	7		31-40 Hz	3.214	0.7	36.1	1.74	5	0.177
								40-50 Hz	2.533	0.207	48	2.9	3		40-50 Hz	3.345	0.557	44.133	1.012	6	0.22
		Figure3

## Sheet: fig3
Figure 3
			WT-1P	SCA2-1P	WT-3P	SCA2-3P	WT-5P	SCA2-5P	WT-10P	SCA2-10P	WT-20P	SCA2-20P	WT-50P	SCA2-50P	WT_CPCCOET	SCA2_CPCCOET			5P_6 months
		Mean	0.0677783	0.100118	0.2108	0.293706	0.347139	0.60825	0.54867	0.78744	0.7517	0.93	1.13122	1.49829	0.05874	0.0372833			SCA2	WT
		STD	0.0605734	0.0618115	0.138457	0.155511	0.159014	0.28788	0.244333	0.358958	0.314129	0.421079	0.372545	0.36308	0.0442333	0.0332223			1.26897	0.57925
		SEM	0.0126304	0.0149915	0.0309599	0.037717	0.0331568	0.064372	0.0509469	0.0926825	0.0702413	0.121555	0.0931362	0.137231	0.0139878	0.0135629			0.454574	0.19448
		n	23	17	20	17	23	20	23	15	20	12	16	7	10	6			0.185579	0.0687592
		ttest	0.0530939		0.0475488		0.000276732		0.00975681		0.0908204		0.0199759		3.08583e-07	3.69828e-05
					*		***		**				*		******	******		ttest	0.00269695

## Sheet: fig4
Figure 4
			WT			SCA2			Stimulation, uAmps			SCA2
			mGluR	mGluR		mGluR	mGluR			WT		Stimulation
			5P	10P		5P	10P				cell	uAmps
		Mean	-25.7692	-40.4286		-50.1111	-71.8889			9		4.55
		STD	15.8911	24.472		12.7225	20.5393			0		1.72295
		SEM	4.24706	6.54042		4.0232	6.84642			0		0.574318
				14		9	9			8		8
		ttest	0.000770559	0.00351145
										3.87843e-06

## Sheet: fig5
Figure 5
							144 nM Ca			144 nM Ca
			WT	480 nM Ca			WT			SCA2
				5P	10P		5P	10P		5P	10P
			avg	-17.9167	-31.5455		-6.41739	-12.3268		-7.07692	-15.125
			Std	7.53728	12.9951		7.19518	11.9843		8.85403	17.8283
			SEM	2.17583	3.91817		1.33611	2.82474		1.73642	4.45709
			n	12	11		23	19		26	16
			ttest	0.000267522	0.000700688		0.775074	0.597747

## Sheet: poweranalysis
		power analysis calculated based on the results we published in Human Molecular Genetics for SCA2 and WT
		for 8 weeks, we need minimum of 127 measurements (if power is 0.9, alpha of 0.05 and effective size f is 0.325).
		for 12 weeks, we need minimum of 42 measurements (if power is 0.9, alpha of 0.05 and effective size f is 0.575.
		for 24 weeks, we need minimum of 14 measurements ( if power is 0.9, alpha of 0.05 and effective size of 1.1)
												Pooled Standdev=SD1(n1-1)+Stddev2(n2-1)/n1+n2-2
			Firing Frequency							meandif	STD				Cohen'sd	Cohen'f	sample size
			WT			SCA2										calculate
		Age	mean	STD	n	mean	STD	n		diff of mean		bothSTD	samplesize	pooled SD	d
		4	30	10.95	120	34	7.99	79		-4		1926.27	197	9.77802	-0.409081
		6	42	8.54	73	35	8.66	75		7		1255.72	146	8.60082	0.813876	0.405	82
		8	46	20.78	48	32	22	54		14		2142.66	100	21.4266	0.653393	0.325	127
		12	43	18.33	84	27	10	100		16		2511.39	182	13.7988	1.15952	0.575	42
		24	43	15.36	59	17	9.22	85		26		1665.36	142	11.7279	2.21694	1.1	14
		40	48	29.69	98	11	9.05	82		37		3612.98	178	20.2976	1.82287	0.91	18
